# Supplementary material
Source: publisher figshare collection journal article supplement (https://acs.figshare.com/ndownloader/files/5787627)

**Supporting Information (17 pages)**

**Intermolecular and Intramolecular Kinetic Isotope Effects in the  
Nitrosoarene Ene Reaction: Experimental Verification for  
Reversible Intermediate Formation**

*Waldemar Adam,<sup>†</sup> Oliver Krebs,<sup>†</sup> Michael Orfanopoulos,<sup>‡</sup> Manolis Stratakis,<sup>‡</sup>*

*Georgios C. Vougioukalakis<sup>‡</sup>*

<sup>†</sup> Institut für Organische Chemie, Universität Würzburg, Am Hubland, D-97074 Würzburg,  
Germany, [http://www-organik.chemie.uni-wuerzburg.de/ak\\_adam/](http://www-organik.chemie.uni-wuerzburg.de/ak_adam/)

<sup>‡</sup> Department of Chemistry, University of Crete, P.O. Box 1470, 71409 Iraklion, Crete,  
Greece, <http://www.chemistry.uoc.gr>

[adam@chemie.uni-wuerzburg.de](mailto:adam@chemie.uni-wuerzburg.de)

Fax: +49-(0)931/888-4756

# Kinetic Analysis to Estimate the Extent of Reversibility in the Ene Reaction of ArNO with the *cis/trans*-TME-d<sub>6</sub> Substrates

- assumption of no steric and secondary isotope effects:

$$\longrightarrow k_f, k_r, k_a(H), k_a(D) \text{ for } cis\text{-TME-d}_6 = k_f, k_r, k_a(H), k_a(D) \text{ for } trans\text{-TME-d}_6$$

$$\longrightarrow \text{for } cis\text{-TME-d}_6: k_f(D) = k_f(H) = k_f \text{ and } k_r(D) = k_r(H) = k_r$$

$$\longrightarrow \text{for } trans\text{-TME-d}_6: k_a^{avg} = \frac{k_a(H) + k_a(D)}{2}$$

- experimental data (Table 1):

$$\left\{ \frac{[P_H]}{[P_D]} \right\}_{trans} = \left( \frac{k_H}{k_D} \right)_{trans(exp)} = \frac{k_a(H)}{k_a(D)} = 3.0 \text{ for } trans\text{-TME-d}_6:$$

$$\left\{ \frac{[P_H]}{[P_D]} \right\}_{cis} = \left( \frac{k_H}{k_D} \right)_{cis(exp)} = 1.5 \text{ for } cis\text{-TME-d}_6:$$

- kinetic expression of the product-forming step for *cis*-TME-d<sub>6</sub> :

$$\left\{ \frac{[P_H]}{[P_D]} \right\}_{cis} = \frac{k_a(H)}{k_a(D)} \frac{[AI_H]}{[AI_D]} \longrightarrow \frac{[AI_H]}{[AI_D]} = \left\{ \frac{[P_H]}{[P_D]} \right\}_{cis} \times \frac{k_a(D)}{k_a(H)} \quad (\text{eq 1})$$

- application of steady-state kinetics on *cis*-TME-d<sub>6</sub>:

$$\left. \begin{aligned} \frac{d[AI_H]}{dt} &= 0 = k_f[E] - k_r[AI_H] - k_a(H)[AI_H] \\ \frac{d[AI_D]}{dt} &= 0 = k_f[E] - k_r[AI_D] - k_a(D)[AI_D] \end{aligned} \right\} \longrightarrow \frac{[AI_H]}{[AI_D]} = \frac{k_r + k_a(D)}{k_r + k_a(H)} \quad (\text{eq 2})$$

- combination of eq 1 and eq 2 to replace  $[AI_H]/[AI_D]$ :

$$\left\{ \frac{[P_H]}{[P_D]} \right\}_{cis} \times \frac{k_a(D)}{k_a(H)} = \frac{k_r + k_a(D)}{k_r + k_a(H)} \quad (\text{eq 3})$$

- substitution into eq 3 for  $k_a(H)/k_a(D) = \{[P_H]/[P_D]\}_{trans}$   
and  $k_a(H) = \{[P_H]/[P_D]\}_{trans} \times k_a(D)$ :

$$\left\{ \frac{[P_H]}{[P_D]} \right\}_{cis} \times \left\{ \frac{[P_D]}{[P_H]} \right\}_{trans} = \frac{k_r + k_a(D)}{k_r + \left\{ \frac{[P_H]}{[P_D]} \right\}_{trans} \times k_a(D)} \quad (\text{eq 4})$$

- substitution of the experimental data into eq 4:

$$1.5 \times \frac{1}{3.0} = \frac{k_r + k_a(D)}{k_r + 3.0 \times k_a(D)}$$

- on solving for  $k_r$  and  $k_a(D)$  and substitution of  $k_a^{avg} = \frac{k_a(H) + k_a(D)}{2}$  :

$$k_r = k_a(D) = 1/3 k_a(H) = 1/2 k_a^{avg}$$

## The Problems with Pentafluoronitrosobenzene as Enophile

For the  $F_5C_6NO$  enophile, the known<sup>2</sup> intermolecular and intramolecular KIE were repeated, in view of the large difference between the reported  $k_H/k_D$  value for  $F_5C_6NO$  ( $1.03 \pm 0.05$ ) with TME- $d_0$  versus TME- $d_{12}$  and the presently measured value for  $p\text{-O}_2N\text{-C}_6\text{H}_4\text{-NO}$  ( $1.98 \pm 0.05$ , first entry in Table 1). Our remeasured for  $F_5C_6NO$  values are now in better accord with the new nitrosoarene enophile  $p\text{-O}_2N\text{-C}_6\text{H}_4\text{-NO}$  (Table S1).

**Table S1.** Intermolecular and Intramolecular Kinetic Isotope Effects for the Ene Reaction of Tetramethylethylenes (TME) with Pentafluoronitrosobenzene

|                          | $k_H/k_D$ values                                                                                                                                                                                                                                                                                                                                                                  |  |                                                                                                                                                                                        |                                                                                                                                                                                        |                                                                                                                                                                                        |
|--------------------------|-----------------------------------------------------------------------------------------------------------------------------------------------------------------------------------------------------------------------------------------------------------------------------------------------------------------------------------------------------------------------------------|--|----------------------------------------------------------------------------------------------------------------------------------------------------------------------------------------|----------------------------------------------------------------------------------------------------------------------------------------------------------------------------------------|----------------------------------------------------------------------------------------------------------------------------------------------------------------------------------------|
|                          | intermolecular                                                                                                                                                                                                                                                                                                                                                                    |  | intramolecular                                                                                                                                                                         |                                                                                                                                                                                        |                                                                                                                                                                                        |
|                          | $\begin{array}{c} \text{H}_3\text{C} \quad \text{CH}_3 \\ \diagdown \quad \diagup \\ \text{C}=\text{C} \\ \diagup \quad \diagdown \\ \text{H}_3\text{C} \quad \text{CH}_3 \end{array}$ vs. $\begin{array}{c} \text{D}_3\text{C} \quad \text{CD}_3 \\ \diagdown \quad \diagup \\ \text{C}=\text{C} \\ \diagup \quad \diagdown \\ \text{D}_3\text{C} \quad \text{CD}_3 \end{array}$ |  | $\begin{array}{c} \text{H}_3\text{C} \quad \text{CD}_3 \\ \diagdown \quad \diagup \\ \text{C}=\text{C} \\ \diagup \quad \diagdown \\ \text{H}_3\text{C} \quad \text{CD}_3 \end{array}$ | $\begin{array}{c} \text{H}_3\text{C} \quad \text{CD}_3 \\ \diagdown \quad \diagup \\ \text{C}=\text{C} \\ \diagup \quad \diagdown \\ \text{D}_3\text{C} \quad \text{CH}_3 \end{array}$ | $\begin{array}{c} \text{D}_3\text{C} \quad \text{CD}_3 \\ \diagdown \quad \diagup \\ \text{C}=\text{C} \\ \diagup \quad \diagdown \\ \text{H}_3\text{C} \quad \text{CH}_3 \end{array}$ |
| enophile                 | TME- $d_0$ vs. TME- $d_{12}$                                                                                                                                                                                                                                                                                                                                                      |  | <i>cis</i> -TME- $d_6$                                                                                                                                                                 | <i>trans</i> -TME- $d_6$                                                                                                                                                               | <i>gem</i> -TME- $d_6$                                                                                                                                                                 |
| $C_6F_5\text{-NO}^{a,b}$ | 1.20-1.77 <sup>c,d</sup> (1.03)                                                                                                                                                                                                                                                                                                                                                   |  | 1.3 <sup>e</sup> (1.2)                                                                                                                                                                 | 3.0 <sup>e</sup> (3.0)                                                                                                                                                                 | (4.5)                                                                                                                                                                                  |

<sup>a</sup> See Experimental Section for details. <sup>c</sup> In parenthesis is given the  $k_H/k_D$  value reported in ref 2 ( $\text{Et}_2\text{O}$ , 2 h, 0 °C). <sup>c</sup> In  $\text{CH}_2\text{Cl}_2$  or  $\text{Et}_2\text{O}$ , determined by GC analysis with cyclohexane as internal standard; calculated according to  $k_H/k_D = \ln \{[A_H]/[A_H]_0\} / \ln \{[A_D]/[A_D]_0\}$ ; error ca. 3% of the stated value. <sup>d</sup> Value depends on the solvent and the reaction conditions, see Table S2. <sup>e</sup> In  $\text{CDCl}_3$ , determined by  $^1\text{H-NMR}$  spectroscopy; error ca. 5% of the stated value.

The intramolecular KIE for *cis*-TME- $d_6$  was now found to be 1.3 ( $\pm 0.07$ ), which is similar to the reported value (1.2).

We have repeated the intermolecular KIE between TME- $d_0$  and TME- $d_{12}$  for this enophile many times at various conversions (10-50%), and we have found that the  $k_H/k_D$  values in dichloromethylene range between 1.20 and 1.77 ( $\pm 0.05$ ). Evidently, the exact value depends on the reaction conditions, which include the extent of conversion, the concentration of the  $F_5C_6NO$  and the substrates, the way of nitroso-enophile addition, and the stirring rate. In ethyl ether, which was used previously as solvent,<sup>2</sup> the reaction proceeds slower and better behaved than in  $CH_2Cl_2$  (ca. 2 h at 0 °C for full conversion of the enophile versus less than 30 min in  $CH_2Cl_2$ ), and we observed  $k_H/k_D$  values of 1.21-1.27 at various conversions, but never 1.03 (Table S2).

**Table S2.** Intermolecular Kinetic Isotope Effects in the Ene Reaction of  $F_5C_6NO$  with the TME- $d_0$  / TME- $d_{12}$  Substrate Pair under a Variety of Reaction Conditions

| $F_5C_6NO$      | ref 2             | present <sup>a</sup>                         |                   |      |      |                                |      |
|-----------------|-------------------|----------------------------------------------|-------------------|------|------|--------------------------------|------|
| solvent         | Et <sub>2</sub> O | CH <sub>2</sub> Cl <sub>2</sub> <sup>b</sup> |                   |      |      | Et <sub>2</sub> O <sup>c</sup> |      |
| convn [%]       | not det.          | 12                                           | 13                | 48   | 22   | 35                             | 48   |
| equiv.          | 0.5               | 0.15                                         | 0.2               | 0.35 |      | 0.5                            |      |
| time [min]      | 120               |                                              | 30                |      | 45   | 100                            | 125  |
| $k_H/k_D$ value | 1.03 <sup>d</sup> | 1.77                                         | 1.47 <sup>e</sup> | 1.20 | 1.23 | 1.27                           | 1.21 |

<sup>a</sup> These  $k_H/k_D$  values were determined by GC analysis of the remaining alkenes with cyclohexane as internal standard; error < 3% of the stated value. <sup>b</sup> Rapid reaction, full conversion of the enophile in less than 30 min at 0 °C;  $k_H/k_D$  value depends on the reaction conditions. <sup>c</sup> Full conversion of the enophile in 2 h at 0 °C. <sup>d</sup> Determined by mass spectroscopy of the remaining alkenes. <sup>e</sup> Instead of 4 mL of  $CH_2Cl_2$ , 9 mL were taken.

Our procedure was similar to that used previously,<sup>2</sup> except we employed 2 mL of a 0.003 M solution of the alkenes in CH<sub>2</sub>Cl<sub>2</sub> (Et<sub>2</sub>O), to which the F<sub>5</sub>C<sub>6</sub>-NO in 2 mL of CH<sub>2</sub>Cl<sub>2</sub> (Et<sub>2</sub>O) was added, whereas previously 50 mL of a 0.015 M solution of the alkenes was used, to which the F<sub>5</sub>C<sub>6</sub>-NO in 20 mL Et<sub>2</sub>O was added; thus, the concentrations in our experiments were for the olefins by a factor of 7.3 lower and for F<sub>5</sub>C<sub>6</sub>-NO by factors of 6 to 42. Moreover, for the determination of the  $k_H/k_D$  values we employed GC analysis on a 60-m capillary column, in which the TME-d<sub>0</sub> and TME-d<sub>12</sub> alkenes are cleanly separated, with cyclohexane as internal standard, whereas previously MS analysis was used, in which the conversions are not specified. Low conversions were chosen for some of our experiments in view of possible local depletion effects for the highly reactive F<sub>5</sub>C<sub>6</sub>-NO enophile. Nevertheless, the error in the GC analysis remains below 5% also for the low conversions, since the signals are well separated and the chromatograms are very clean. We have conducted the experiments at higher conversions and lower (but still substantial) normal kinetic isotope effects were obtained; however, the results are not reproducible.

In conclusion, our present  $k_H/k_D$  values for the ene reaction of F<sub>5</sub>C<sub>6</sub>-NO with the TME-d<sub>0</sub>/TME-d<sub>12</sub> substrate pair clearly demonstrate the difficulties with this highly reactive enophile in mechanistic work. We recommend the use of *p*-O<sub>2</sub>N-C<sub>6</sub>H<sub>4</sub>-NO as nitrosoarene enophile, which exhibits sufficient reactivity and provides reproducible intermolecular kinetic isotope effects.

## Experimental Section

**General Aspects.** To obtain well-resolved NMR spectra of the hydroxylamine ene products, immediately before measurement ca. 5  $\mu$ L phenylhydrazine were added to the  $\text{CDCl}_3$  solution as scavenger of paramagnetic impurities. For quantitative  $^1\text{H}$ -NMR analyses, a relaxation delay of 20 s with a  $30^\circ$  pulse was used. TLC analysis was conducted on precoated silica-gel foils 60 F<sub>254</sub> (20 x 20 cm). Spots were visualized by UV irradiation (254 nm), by a 5% solution of phosphomolybdic acid in ethanol, or by a 1 N aqueous NaOH solution (for nitroso ene products). Solvents were dried by standard methods and purified by distillation before use. Commercially available substances were purified by standard procedures. The isotopic and stereochemical purity of the deuterium-labeled alkenes was determined by MS, GC, and  $^1\text{H}$ -NMR analysis. The nitrosoarene ene reactions were conducted under exclusion of light and moisture.

**Starting Materials.** 4-Nitronitrosobenzene ( $\text{ArNO}$ ) was prepared by oxidation of 4-nitroaniline with potassium monoperoxysulfate (kindly supplied by Peroxid-Chemie GmbH, Pullach bei München, Germany) according to the literature procedure<sup>S1</sup> and purified by recrystallization from methanol. 4-Phenyl-1,2,4-triazoline-3,5-dione (PTAD)<sup>S2</sup> and pentafluoronitrosobenzene<sup>S3</sup> were made according to literature procedures and purified by sublimation. The 2,3-dimethyl-2-butenes (*cis*-TME- $\text{d}_6$ ,<sup>S4</sup> *trans*-TME- $\text{d}_6$ ,<sup>S5</sup> *gem*-TME- $\text{d}_6$ ,<sup>S6</sup> and TME- $\text{d}_{12}$ <sup>S7</sup>) and the 3-methyl-1-phenyl-2-butenes (**2**- $\text{d}_0$ <sup>S8</sup> and **2**- $\text{d}_6$ <sup>S9</sup>) were prepared as reported.

**GP-1: General Procedure for the Ene Reaction with 4-Nitronitrosobenzene on the Preparative Scale.** To a solution of the alkene in dry dichloromethane (200 mL) was added 4-nitronitrosobenzene at 0  $^\circ\text{C}$ . The reaction mixture was stirred at this temperature for 24 h until complete conversion [TLC detection, petroleum ether/ethyl ether (2:1) as

eluent]. The product was extracted from the organic layer with 4% aqueous sodium hydroxide solution (3 x 50 mL). After acidification with 98% sulfuric acid at 0 °C, the water layer was extracted with CH<sub>2</sub>Cl<sub>2</sub> (3 x 50 mL). The combined organic layers were washed with water (1 x 50 mL), dried over anhydrous Na<sub>2</sub>SO<sub>4</sub>, and the solvent was removed (40 °C, 800 mbar). The crude ene products were purified by silica-gel flash chromatography [petroleum ether/dichloromethane (3:1) as eluent].

**Ene Reaction of 4-Nitronitrosobenzene with 2,3-Dimethyl-2-butene on the Preparative**

**Scale:     *N*-Hydroxyl-*N*-(4-nitrophenyl)-*N*-(1,1,2-trimethyl-2-propenyl)amine     (3a).<sup>7</sup>**

According to the general procedure (GP-1), 280 mg (3.33 mmol) of 2,3-dimethyl-2-butene (TME-d<sub>0</sub>) were treated with 506 mg (3.33 mmol) of 4-nitronitrosobenzene. The workup yielded 606 mg (77%) of the ene product as air sensitive, yellow oil, R<sub>f</sub> [petroleum ether/dichloromethane (4:1) as eluent] = 0.4. IR (KBr):  $\tilde{\nu}$  3382, 2980, 1593, 1499, 1323, 1112 cm<sup>-1</sup>; <sup>1</sup>H NMR (250 MHz, CDCl<sub>3</sub>):  $\delta$  1.26 (s, 6 H, 2 × CH<sub>3</sub>), 1.81 (s, 3 H, CH<sub>3</sub>), 4.86 (s, br, 1 H, CH), 4.90 (s, br, 1 H, CH), 7.20 (m, 2 H, CH<sub>2</sub>), 8.00 (m, 2 H, CH<sub>2</sub>), OH signal not detected; <sup>13</sup>C NMR (63 MHz, CDCl<sub>3</sub>):  $\delta$  21.1 (2 × q), 25.2 (q), 69.8 (s), 113.5 (t), 120.1 (2 × d), 125.7 (2 × d), 143.6 (s), 152.2 (s) 157.7 (s). Anal. Calc. for C<sub>12</sub>H<sub>16</sub>N<sub>2</sub>O<sub>3</sub> (236.3): C, 61.00; H, 6.83; N, 11.86. Found: C 60.82; H 6.64; N 11.63.

**Ene Reaction of 4-Nitronitrosobenzene with 3-Methyl-1-phenyl-2-butene on the**

**Preparative     Scale:     *N*-Hydroxyl-*N*-(2-methyl-1-phenylmethylpropenyl)-*N*-(4-nitrophenyl)amine (3b).** According to the general procedure (GP-1), 1.00 g (6.85 mmol) of 3-methyl-1-phenyl-2-butene (2-d<sub>0</sub>) were treated with 400 mg (2.63 mmol) of 4-nitronitrosobenzene. The workup yielded 462 mg (59%) of the ene product as yellow oil, R<sub>f</sub> [petroleum ether/dichloromethane (2:1) as eluent] = 0.2. IR (KBr):  $\tilde{\nu}$  3551, 3087, 3029,

2972, 2926, 1594, 1550, 1515, 1335, 1253, 1005  $\text{cm}^{-1}$ ;  $^1\text{H}$  NMR (400 MHz,  $\text{CDCl}_3$ ):  $\delta$  1.78 (s, 3 H,  $\text{CH}_3$ ), 3.15 (dd,  $J_1 = 14.1$  Hz,  $J_2 = 6.1$  Hz, 1 H, CH), 3.30 (dd,  $J_1 = 14.1$  Hz,  $J_2 = 9.0$  Hz, 1 H, CH), 4.59 (dd,  $J_1 = 9.0$  Hz,  $J_2 = 6.0$  Hz, 1 H, CH), 5.01 (s, br, 1 H, CH), 5.02 (s, br, 1 H, CH), 6.91 (m, 2 H,  $\text{CH}_2$ ), 7.20-7.27 (m, 5 H, CH,  $2 \times \text{CH}_2$ ), 8.00 (m, 2 H,  $\text{CH}_2$ ), OH signal not detected;  $^{13}\text{C}$  NMR (101 MHz,  $\text{CDCl}_3$ ):  $\delta$  20.9 (q), 35.7 (t), 69.2 (d), 112.4 ( $2 \times$  d), 115.0 (t), 125.2 ( $2 \times$  d), 126.5 (d), 128.3 ( $2 \times$  d), 129.1 ( $2 \times$  d), 138.3 (s), 139.6 (s), 142.0 (s), 156.1 (s). Anal. Calc. for  $\text{C}_{17}\text{H}_{18}\text{N}_2\text{O}_3$  (298.3): C, 68.44; H, 6.08; N, 9.39. Found: C 68.24; H, 6.04; N, 9.41.

**GP-2: General Procedure for the Ene Reaction of 4-Nitronitrosobenzene with the Unlabeled Alkenes on the NMR Scale.** Under an argon-gas atmosphere, the alkene was dissolved in 5.00 mL of argon-saturated  $\text{CDCl}_3$ . To this solution were added 50.0  $\mu\text{L}$  of tetrachloroethane as internal standard. A 500- $\mu\text{L}$  aliquot of this stock solution was taken for the  $^1\text{H}$ -NMR reference spectrum. To the remaining stock solution were added 500 mg (3.29 mmol) of 4-nitronitrosobenzene at 0  $^\circ\text{C}$ , and the reaction mixture was stirred at this temperature for 24 h. The conversion and the product balance were determined by  $^1\text{H}$ -NMR analysis, the results are given below.

**Ene Reaction of 4-Nitronitrosobenzene with the Unlabeled 2,3-Dimethyl-2-butene on the NMR Scale.** According to the general procedure (GP-2), 0.55 g (6.58 mmol) of 2,3-dimethyl-2-butene were treated with 500 mg (3.29 mmol) of 4-nitronitrosobenzene. The conversion was 92% (normalized to 1 equiv. of alkene), the product balance >95%.

**Ene Reaction of 4-Nitronitrosobenzene with the Unlabeled 3-Methyl-1-phenyl-2-butene on the NMR Scale.** According to the general procedure GP-2, 0.96 g (6.58 mmol)



3-methyl-1-phenyl-2-butene were treated with 500 mg (3.29 mmol) of 4-nitronitrosobenzene. The conversion was 78% (normalized to 1 equiv. of alkene), the product balance >95%.

**GP-3: General Procedure for the Ene Reaction of 4-Nitronitrosobenzene with the Deuterium Stereo-Labeled Hexadeuterio-2,3-dimethyl-2-butenes on the  $^1\text{H}$ -NMR Scale to detect the Intramolecular Kinetic Isotope Effects (KIE).** In a NMR tube the alkene was dissolved in 400  $\mu\text{L}$  of  $\text{CDCl}_3$  at 20  $^\circ\text{C}$ . The tube was closed, cooled to 0  $^\circ\text{C}$ , and a 300- $\mu\text{L}$  aliquot of a stock solution of 4-nitronitrosobenzene in  $\text{CDCl}_3$  (molarity is given for the specific cases) was added in one portion. The tube was closed, vigorously shaken and, stored in an ice bath for 4 h. The conversion and the product distribution were determined by  $^1\text{H}$ -NMR analysis, from which the kinetic isotope effect (KIE) was calculated.

**Ene Reaction of 4-Nitronitrosobenzene with *cis*-TME- $\text{d}_6$ .** According to the general procedure (GP-3), 4.0 mg (4.44  $\mu\text{mol}$ ) of *cis*-TME- $\text{d}_6$  were treated with 4.5 mg (2.96  $\mu\text{mol}$ ) of 4-nitronitrosobenzene. The conversion was 88% (normalized to 1 equiv. of alkene) and the kinetic isotope effect  $k_{\text{H}}/k_{\text{D}} = 1.5$ .

**Ene Reaction of 4-Nitronitrosobenzene with *trans*-TME- $\text{d}_6$ .** According to the general procedure (GP-3), 7.1 mg (7.89  $\mu\text{mol}$ ) of *trans*-TME- $\text{d}_6$  were treated with 8.0 mg (5.26  $\mu\text{mol}$ ) of 4-nitronitrosobenzene. The conversion was >95% (normalized to 1 equiv. of alkene) and the kinetic isotope effect  $k_{\text{H}}/k_{\text{D}} = 3.0$ .

**Ene Reaction of 4-Nitronitrosobenzene with *gem*-TME- $\text{d}_6$ .** According to the general procedure (GP-3), 16.0 mg (17.8  $\mu\text{mol}$ ) of *gem*-TME- $\text{d}_6$  were treated with 18.0 mg

(11.9  $\mu\text{mol}$ ) of 4-nitronitrosobenzene. The conversion was 94% (normalized to 1 equiv. of alkene) and the kinetic isotope effect  $k_{\text{H}}/k_{\text{D}} = 4.0$ .

**GP-4: General Procedure for the Ene Reaction of 4-Nitronitrosobenzene with the Perprotio/Perdeuterio-Alkene Pairs on the GC Scale for the Intermolecular Kinetic Isotope Effects (KIE) on the Basis of the Alkene Conversions.** Into a 4-mL glass vial was placed the required amount of a stock sample (exact quantities are given for the specific cases) of the two alkenes and the internal standard (cyclohexane or dodecane) in 2.00 mL  $\text{CH}_2\text{Cl}_2$  at 20 °C. A 10- $\mu\text{L}$  aliquot of this solution was taken as reference GC sample. The vial was closed, cooled to 0°C and a 2-mL aliquot of a stock solution of 4-nitronitrosobenzene in  $\text{CH}_2\text{Cl}_2$  (molarity is given for the specific cases) was added. The closed vial was vigorously shaken and stirred in the ice bath for 4 h. The conversions were determined by GC analysis, from which the kinetic isotope effect (KIE) was calculated.

**Ene Reaction of 4-Nitronitrosobenzene with TME- $\text{d}_0$  versus TME- $\text{d}_{12}$ .** According to the general procedure (GP-4), 2.52 mg (3.00  $\mu\text{mol}$ ) of TME- $\text{d}_0$ , 2.88 mg (3.00  $\mu\text{mol}$ ) of TME- $\text{d}_{12}$  and 2.52 mg (3.00  $\mu\text{mol}$ ) cyclohexane (internal standard) were treated with 3.94 mg (2.00  $\mu\text{mol}$ ) of 4-nitronitrosobenzene. The conversion of TME- $\text{d}_0$  was 39% and of TME- $\text{d}_{12}$  22% [ $k_{\text{H}}/k_{\text{D}} = 1.98 \pm 0.05$ ]. A second run was carried out under the same conditions, which gave the same  $k_{\text{H}}/k_{\text{D}}$  value.

**Ene Reaction of 4-Nitronitrosobenzene with 3-Methyl-1-phenyl-2-butene- $\text{d}_0$  (2- $\text{d}_0$ ) versus 3-Methyl-1-phenyl-2-butene- $\text{d}_6$  (2- $\text{d}_6$ ).** According to the general procedure (GP-4), 4.38 mg (3.00  $\mu\text{mol}$ ) of 2- $\text{d}_0$ , 4.56 mg (3.00  $\mu\text{mol}$ ) of 2- $\text{d}_6$  and 5.10 mg (3.00  $\mu\text{mol}$ )

dodecane (internal standard) were treated with 4.33 mg (2.20  $\mu\text{mol}$ ) of 4-nitronitrosobenzene. The conversion of **2**-d<sub>0</sub> was 37% and of **2**-d<sub>6</sub> 32% [ $k_{\text{H}}/k_{\text{D}} = 1.18 \pm 0.04$ ].

**GP-5: General Procedure for the Ene Reaction of 4-Nitronitrosobenzene with the Perprotio-/Perdeuterio-Alkene Pairs on the <sup>1</sup>H-NMR Scale for the Intermolecular Kinetic Isotope Effects (KIE) on the Basis of the Product Distribution.** Into a NMR tube was placed the required amount of a stock solution (exact quantities are given for the specific cases) of the two alkenes in 400  $\mu\text{L}$   $\text{CDCl}_3$  at 20 °C. The tube was closed, cooled to 0 °C, and a 300- $\mu\text{L}$  aliquot of a stock solution of 4-nitronitrosobenzene in  $\text{CDCl}_3$  (molarity is given for the specific cases) was added in one portion. The tube was closed, vigorously shaken, and placed into an ice bath for 4 h. The product distribution was determined by <sup>1</sup>H-NMR analysis, from which the kinetic isotope effect (KIE) was calculated.

**Ene Reaction of 4-Nitronitrosobenzene with TME-d<sub>0</sub> versus TME-d<sub>12</sub>.** According to the general procedure (GP-5), 2.52 mg (3.00  $\mu\text{mol}$ ) of TME-d<sub>0</sub> and 2.88 mg (3.00  $\mu\text{mol}$ ) of TME-d<sub>12</sub> were treated with 3.04 mg (2.00  $\mu\text{mol}$ ) of 4-nitronitrosobenzene. The kinetic isotope effect (KIE), which was determined from the product distribution, was  $k_{\text{H}}/k_{\text{D}} = 2.0$ . A sample <sup>1</sup>H-NMR spectrum of the crude reaction mixture is given below.

**Scheme S1.** <sup>1</sup>H-NMR Spectroscopic Analysis of the Product Distribution from the Intermolecular Competition between TME-d<sub>0</sub> and TME-d<sub>12</sub> in the Ene Reaction of 4-Nitronitrosobenzene

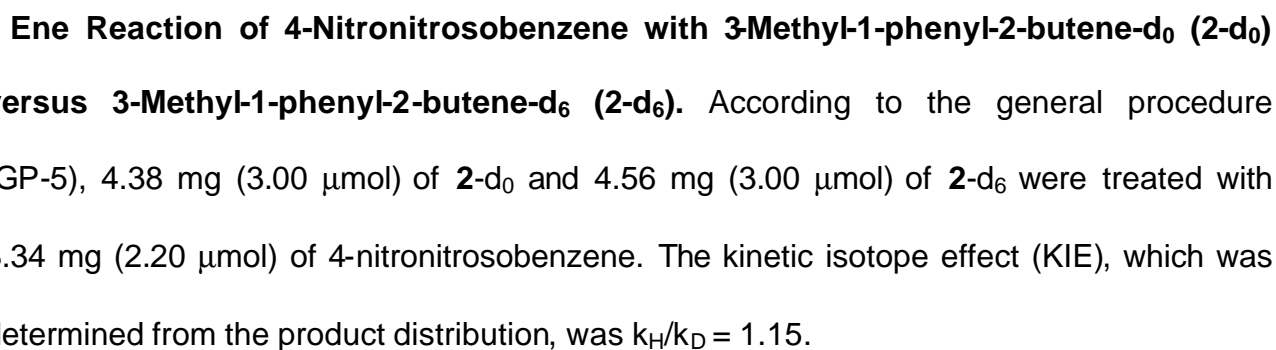

**GP-6: General Procedure for the Ene Reaction of Pentafluoronitrosobenzene with the Deuterium Stereo-Labeled Hexadeuterio-2,3-dimethyl-2-butenes on the  $^1\text{H}$ -NMR**

**Scale for the Intramolecular Kinetic Isotope Effects (KIE).** A NMR tube was charged with the alkene in 400  $\mu\text{L}$   $\text{CDCl}_3$  at 20  $^\circ\text{C}$ . The tube was closed, cooled to 0  $^\circ\text{C}$ , and a 300- $\mu\text{L}$  aliquot of a stock solution of pentafluoronitrosobenzene in  $\text{CDCl}_3$  (molarity is given for the specific cases) was added in one portion. The tube was closed, vigorously shaken, and placed into an ice bath for 30 min. The conversion and the product distribution were determined by  $^1\text{H}$ -NMR analysis, from which the kinetic isotope effect (KIE) was calculated.

**Ene Reaction of Pentafluoronitrosobenzene with *cis*-TME- $\text{d}_6$ .** According to the general procedure (GP-6), 4.0 mg (4.44  $\mu\text{mol}$ ) of *cis*-TME- $\text{d}_6$  were treated with 2.2 mg (1.12  $\mu\text{mol}$ ) of pentafluoronitrosobenzene. The conversion was 91% (normalized to 1 equiv. of alkene) and the kinetic isotope effect  $k_{\text{H}}/k_{\text{D}} = 1.3$ .

**Ene Reaction of Pentafluoronitrosobenzene with *trans*-TME- $\text{d}_6$ .** According to the general procedure (GP-6), 2.98 mg (3.33  $\mu\text{mol}$ ) of *cis*-TME- $\text{d}_6$  were treated with 4.56 mg (3.00  $\mu\text{mol}$ ) of pentafluoronitrosobenzene. The conversion was 88% and the kinetic isotope effect  $k_{\text{H}}/k_{\text{D}} = 3.0$ .

**GP-7: General Procedure for the Ene Reaction of Pentafluoronitrosobenzene with the TME- $\text{d}_0$  versus TME- $\text{d}_{12}$  Alkene Pair on the GC Scale for the Intermolecular Kinetic Isotope Effects (KIE).** Into an 4-mL glass vial was placed the required amount of a stock sample (exact quantities are given for the specific cases) of the two alkenes in 2.00 mL  $\text{CH}_2\text{Cl}_2$  (or  $\text{Et}_2\text{O}$ ) at 20  $^\circ\text{C}$ . A 10- $\mu\text{L}$  aliquot of this solution was taken for a GC reference sample. The vial was closed, cooled to 0  $^\circ\text{C}$ , and a 2.00 mL aliquot of a stock solution of pentafluoronitrosobenzene in  $\text{CH}_2\text{Cl}_2$  (or  $\text{Et}_2\text{O}$ , molarity is given for the specific

cases) was added in one portion. The vial was closed, vigorously shaken, and stirred in an ice bath for 30 min. The conversions were determined by GC analysis, from which the kinetic isotope effect (KIE) was calculated.

**Ene Reaction of Pentafluoronitrosobenzene (0.3 Equiv.) with TME-d<sub>0</sub> versus TME-d<sub>12</sub> in CH<sub>2</sub>Cl<sub>2</sub>.** According to the general procedure (GP-7), 2.52 mg (3.00 μmol) of TME-d<sub>0</sub>, 2.88 mg (3.00 μmol) of TME-d<sub>12</sub> and 2.52 mg (3.00 μmol) cyclohexane (internal standard) were treated with 1.97 mg (1.00 μmol) of pentafluoronitrosobenzene. The conversion of TME-d<sub>0</sub> was 15% and of TME-d<sub>12</sub> 9.0% [ $k_H/k_D = 1.77 \pm 0.05$ ].

**Ene Reaction of Pentafluoronitrosobenzene (0.4 Equiv.) with TME-d<sub>0</sub> versus TME-d<sub>12</sub> in CH<sub>2</sub>Cl<sub>2</sub> at Lower Concentration.** According to the general procedure (GP-7), 2.52 mg (3.00 μmol) of TME-d<sub>0</sub>, 2.88 mg (3.00 μmol) of TME-d<sub>12</sub> and 2.52 mg (3.00 μmol) cyclohexane (internal standard) were treated with 1.52 mg (1.20 μmol) of pentafluoronitrosobenzene. Instead of 2 x 2 mL CH<sub>2</sub>Cl<sub>2</sub>, 6 mL of CH<sub>2</sub>Cl<sub>2</sub> were used to dissolve the alkenes and the enophile was added in 3 mL CH<sub>2</sub>Cl<sub>2</sub>. The overall conversion of TME-d<sub>0</sub> and TME-d<sub>12</sub> was 13% and the calculated  $k_H/k_D$  value was 1.47 ( $\pm 0.04$ ).

**Ene Reaction of Pentafluoronitrosobenzene (0.7 Equiv.) with TME-d<sub>0</sub> versus TME-d<sub>12</sub> in CH<sub>2</sub>Cl<sub>2</sub>.** According to the general procedure (GP-7), 2.52 mg (3.00 μmol) of TME-d<sub>0</sub>, 2.88 mg (3.00 μmol) of TME-d<sub>12</sub> and 2.52 mg (3.00 μmol) cyclohexane (internal standard) were treated with 4.10 mg (2.08 μmol) of pentafluoronitrosobenzene. The conversion of TME-d<sub>0</sub> was 37% and of TME-d<sub>12</sub> 32% [ $k_H/k_D = 1.20 \pm 0.04$ ].

**Ene Reaction of Pentafluoronitrosobenzene (1 Equiv.) with TME-d<sub>0</sub> versus TME-d<sub>12</sub> in Et<sub>2</sub>O.** According to the general procedure (GP-7), 3.19 mg (3.80  $\mu$ mol) of TME-d<sub>0</sub>, 3.65 mg (3.80  $\mu$ mol) of TME-d<sub>12</sub> and 3.19 mg (3.80  $\mu$ mol) cyclohexane (internal standard) in 2.5 mL of Et<sub>2</sub>O were treated with 7.49 mg (3.80  $\mu$ mol) of pentafluoronitrosobenzene in 2.0 mL of Et<sub>2</sub>O. The conversions of TME-d<sub>0</sub> and of TME-d<sub>12</sub> were determined by GC analysis at various reaction times, from which the kinetic isotope effects were calculated.

| entry | time<br>[min] | conversions [%] <sup>a</sup> |                     |         | $k_H/k_D$ <sup>b</sup> |
|-------|---------------|------------------------------|---------------------|---------|------------------------|
|       |               | TME-d <sub>0</sub>           | TME-d <sub>12</sub> | overall |                        |
| 1     | 45            | 24.4                         | 20.3                | 22      | 1.23 ( $\pm 0.04$ )    |
| 2     | 100           | 39.0                         | 32.2                | 35      | 1.27 ( $\pm 0.04$ )    |
| 3     | 125           | 51.7                         | 45.2                | 48      | 1.21 ( $\pm 0.04$ )    |

<sup>a</sup> Determined by GC analysis with cyclohexane as internal standard; error ca. 3% of the stated value. <sup>b</sup> Calculated according to  $k_H/k_D = \ln \{[A_H]/[A_H]_0\} / \ln \{[A_D]/[A_D]_0\}$ ; error ca. 3% of the stated value.

## Additional References

- (S1) Bamberger, E.; Hübner, R. *Ber. Dtsch. Chem. Ges.* **1903**, 36, 3803-3814.
- (S2) Izydore, R. A.; Chapman, J. J.; Mitchel, J. A.; Cummings, R.; Jones, G. T. *J. Chem. Soc., Perkin Trans. 2* **1988**, 1415-1422.
- (S3) Castellano, J. A.; Green, J.; Kauffman, J. M. *J. Org. Chem.* **1966**, 31, 821-824.
- (S4) (a) Roberge, J. Y.; Deslongchamps, P. *Synth. Commun.* **1989**, 817-827. (b) Grdina, M. B.; Orfanopoulos, M.; Stephenson, L. M. *J. Org. Chem.* **1979**, 44, 2936-2938.
- (S5) Müller, P.; Pfyffer, J. *Helv. Chim. Acta* **1992**, 75, 745-750.
- (S6) (a) Adam, W.; Rojas, C. I. *Synthesis* **1972**, 616-618. (b) Adam, W.; Baeza, J.; Liu, J.-C. *J. Am. Chem. Soc.* **1972**, 94, 2000-2006.
- (S7) (a) Crank, G.; Eastwood, F. W. *Aust. J. Chem.* **1964**, 17, 1392-1398. (b) Adams, R.; Adams, E. W.; Clarke, H. T.; Phillips, R. In *Org. Syntheses, Coll., Vol. I*, Gilman, H., Ed.; John Wiley and Sons: New York, 1932; pp 448-450.
- (S8) Angelis, Y. S.; Orfanopoulos, M. *J. Org. Chem.* **1997**, 62, 6083-6085.
- (S9) Angelis, Y.; Zhang, X.; Orfanopoulos, M. *Tetrahedron Lett.* **1996**, 37, 5991-5994.



## Structure Matrix

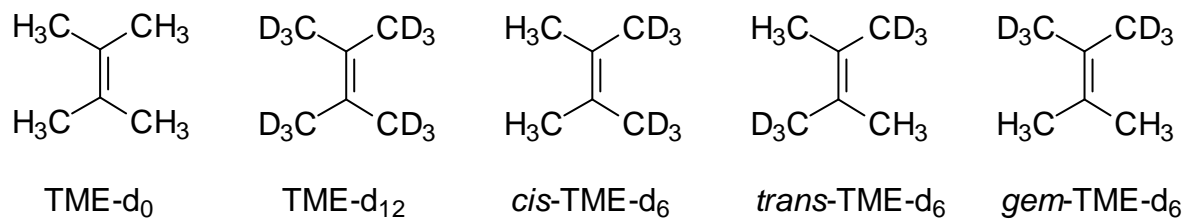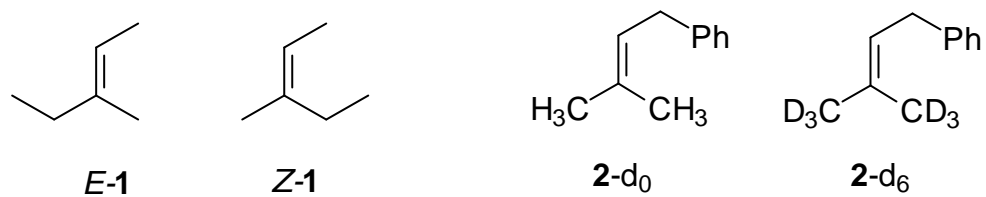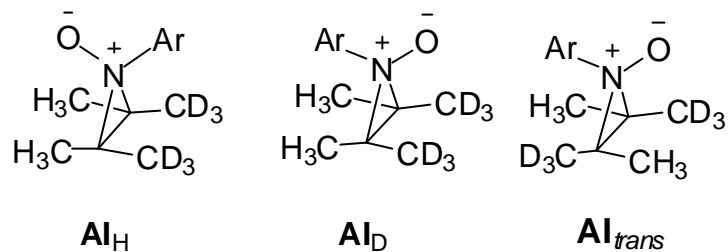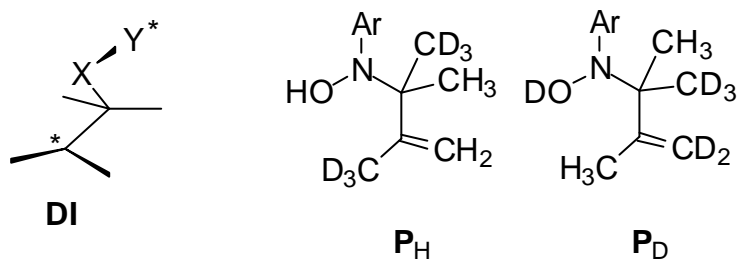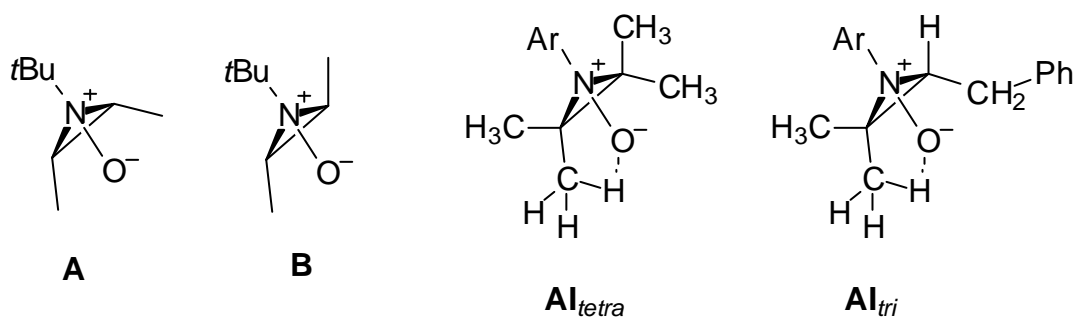

Supplement: Supplementary file 1 [file 5787627]
